# Supplementary material for: Standing genetic variation fuels rapid adaptation to ocean acidification
Source: PubMed Central journal article supplement (PMC6925106; doi:10.1038/s41467-019-13767-1), 2019-12-20
Supplement: 41467_2019_13767_MOESM3_ESM.pdf [file 41467_2019_13767_MOESM3_ESM.pdf]

## Description of Additional Supplementary Files

**File name:** Supplementary Data 1

**Description:** Annotations for ambient, low pH, and shared outlier loci (all contained as separate tabs within file).

**File name:** Supplementary Data 2

**Description:** Ambient pH outlier loci .fasta sequences.

**File name:** Supplementary Data 3

**Description:** Low pH outlier loci .fasta sequences.

**File name:** Supplementary Data 4

**Description:** Shared pH outlier loci .fasta sequences.

**File name:** Supplementary Data 5

**Description:** Annotation for genes displaying signatures of selection for shell growth in ambient pH, low pH, and both pH environments (“sharedpH” genes) (all contained as separate tabs within file).

**File name:** Supplementary Data 6

**Description:** Ambient pH shell growth genes .fasta sequences.

**File name:** Supplementary Data 7

**Description:** Low pH shell growth genes .fasta sequences.

**File name:** Supplementary Data 8

**Description:** Shared pH shell growth genes .fasta sequences.
