# Supplementary material for: Standing genetic variation fuels rapid adaptation to ocean acidification
Source: PubMed Central journal article supplement (PMC6925106; doi:10.1038/s41467-019-13767-1), 2019-12-20
Supplement: 41467_2019_13767_MOESM12_ESM.pdf [file 41467_2019_13767_MOESM12_ESM.pdf]

## Reporting Summary

Nature Research wishes to improve the reproducibility of the work that we publish. This form provides structure for consistency and transparency in reporting. For further information on Nature Research policies, see [Authors & Referees](#) and the [Editorial Policy Checklist](#).

### Statistics

For all statistical analyses, confirm that the following items are present in the figure legend, table legend, main text, or Methods section.

n/a Confirmed

- |                                     |                                     |                                                                                                                                                                                                                                                            |
|-------------------------------------|-------------------------------------|------------------------------------------------------------------------------------------------------------------------------------------------------------------------------------------------------------------------------------------------------------|
| <input type="checkbox"/>            | <input checked="" type="checkbox"/> | The exact sample size ( $n$ ) for each experimental group/condition, given as a discrete number and unit of measurement                                                                                                                                    |
| <input checked="" type="checkbox"/> | <input type="checkbox"/>            | A statement on whether measurements were taken from distinct samples or whether the same sample was measured repeatedly                                                                                                                                    |
| <input type="checkbox"/>            | <input checked="" type="checkbox"/> | The statistical test(s) used AND whether they are one- or two-sided<br><i>Only common tests should be described solely by name; describe more complex techniques in the Methods section.</i>                                                               |
| <input type="checkbox"/>            | <input checked="" type="checkbox"/> | A description of all covariates tested                                                                                                                                                                                                                     |
| <input type="checkbox"/>            | <input checked="" type="checkbox"/> | A description of any assumptions or corrections, such as tests of normality and adjustment for multiple comparisons                                                                                                                                        |
| <input type="checkbox"/>            | <input checked="" type="checkbox"/> | A full description of the statistical parameters including central tendency (e.g. means) or other basic estimates (e.g. regression coefficient) AND variation (e.g. standard deviation) or associated estimates of uncertainty (e.g. confidence intervals) |
| <input type="checkbox"/>            | <input checked="" type="checkbox"/> | For null hypothesis testing, the test statistic (e.g. $F$ , $t$ , $r$ ) with confidence intervals, effect sizes, degrees of freedom and $P$ value noted<br><i>Give <math>P</math> values as exact values whenever suitable.</i>                            |
| <input checked="" type="checkbox"/> | <input type="checkbox"/>            | For Bayesian analysis, information on the choice of priors and Markov chain Monte Carlo settings                                                                                                                                                           |
| <input checked="" type="checkbox"/> | <input type="checkbox"/>            | For hierarchical and complex designs, identification of the appropriate level for tests and full reporting of outcomes                                                                                                                                     |
| <input checked="" type="checkbox"/> | <input type="checkbox"/>            | Estimates of effect sizes (e.g. Cohen's $d$ , Pearson's $r$ ), indicating how they were calculated                                                                                                                                                         |

*Our web collection on [statistics for biologists](#) contains articles on many of the points above.*

### Software and code

Policy information about [availability of computer code](#)

Data collection

Phenotypic and genetic data were collected by the authors of this study. A published and publicly available transcriptome from Moreira et al. 2015 (doi: 10.1186/s12864-015-1817-5) was used as a reference for read alignment and to identify annotations of outliers and candidate genes.

Data analysis

Software used in this study: PoPoolation2 (10.1371/journal.pone.0015925); Bowtie 2 (10.1038/nmeth.1923); seacarb (<https://cran.r-project.org/package=seacarb>); qvalue (<http://www.bioconductor.org/packages/release/bioc/html/qvalue.html>); Trimmomatic (10.1093/bioinformatics/btu170); Genome Analysis Toolkit (GATK; 10.1002/0471250953.bi1110s43); VCFTools (10.1093/bioinformatics/btr330); poolFstat (10.1534/genetics.118.300900)  
All custom code is available at <https://github.com/MarkCBitter>

For manuscripts utilizing custom algorithms or software that are central to the research but not yet described in published literature, software must be made available to editors/reviewers. We strongly encourage code deposition in a community repository (e.g. GitHub). See the Nature Research [guidelines for submitting code & software](#) for further information.

### Data

Policy information about [availability of data](#)

All manuscripts must include a [data availability statement](#). This statement should provide the following information, where applicable:

- Accession codes, unique identifiers, or web links for publicly available datasets
- A list of figures that have associated raw data
- A description of any restrictions on data availability

Exome capture sequencing data generated for this study will be available upon publication as .fastq files within an NCBI SRA project. All data used in reported analyses are publicly available at <https://github.com/MarkCBitter>

## Field-specific reporting

Please select the one below that is the best fit for your research. If you are not sure, read the appropriate sections before making your selection.

Life sciences  Behavioural & social sciences  Ecological, evolutionary & environmental sciences

For a reference copy of the document with all sections, see [nature.com/documents/nr-reporting-summary-flat.pdf](https://www.nature.com/documents/nr-reporting-summary-flat.pdf)

## Ecological, evolutionary & environmental sciences study design

All studies must disclose on these points even when the disclosure is negative.

|                                   |                                                                                                                                                                                                                                                                                                                                                                                                                                                                       |
|-----------------------------------|-----------------------------------------------------------------------------------------------------------------------------------------------------------------------------------------------------------------------------------------------------------------------------------------------------------------------------------------------------------------------------------------------------------------------------------------------------------------------|
| Study description                 | We tracked the phenotypic distributions and trajectories of 29,400 single nucleotide polymorphisms (SNPs), from the embryo stage through larval pelagic growth and settlement in a genetically diverse larval population, within an artificially imposed ambient (pHT 8.05) and extreme low pH treatment (pHT 7.4) using the Mediterranean mussel, <i>Mytilus galloprovincialis</i> .                                                                                 |
| Research sample                   | Adult <i>M. galloprovincialis</i> were collected to generate gametes and produce a population of genetically diverse larvae, which we tracked throughout development in two pH environments.                                                                                                                                                                                                                                                                          |
| Sampling strategy                 | Logistical constraints set the number of treatment replicates in this experiment (N = 6 per treatment).                                                                                                                                                                                                                                                                                                                                                               |
| Data collection                   | Phenotypic data was collected by photographing larvae using brightfield microscopy and shell size analysis in imageJ. This was completed by M.C.Bitter.<br>Genetic data was collected by exome capture. Genomic DNA extractions were conducted by M.C.Bitter, library preparations and hybridization of gDNA to capture array was conducted by Arbor Biosciences. Sequencing on Illumina HiSeq4000 was conducted by the University of Chicago Genomics Core Facility. |
| Timing and spatial scale          | The experiment ran from 1 October 2017-13 November 2013. This was the timescale over which the mussel larvae developed from embryos to settled individuals.                                                                                                                                                                                                                                                                                                           |
| Data exclusions                   | No data were excluded from analysis.                                                                                                                                                                                                                                                                                                                                                                                                                                  |
| Reproducibility                   | We used six independent replicates per experiment.                                                                                                                                                                                                                                                                                                                                                                                                                    |
| Randomization                     | Larvae in each replicate bucket were seeded from the same, well-mixed starting population.                                                                                                                                                                                                                                                                                                                                                                            |
| Blinding                          | Blinding is not relevant.                                                                                                                                                                                                                                                                                                                                                                                                                                             |
| Did the study involve field work? | <input checked="" type="checkbox"/> Yes <input type="checkbox"/> No                                                                                                                                                                                                                                                                                                                                                                                                   |

## Field work, collection and transport

|                          |                                                                                                                                                               |
|--------------------------|---------------------------------------------------------------------------------------------------------------------------------------------------------------|
| Field conditions         | Adult mussels were collected via snorkel from a standing dock in Thau Lagoon, Sète, France in September 2017. Conditions were calm, skies were grey.          |
| Location                 | Thau Lagoon, Sète, France (43.415oN, 3.688oE). Adult mussels collected in 0.5 m water.                                                                        |
| Access and import/export | Samples collected were exported from France to the United States by ULISSE CNRS.                                                                              |
| Disturbance              | Only adult, putatively gravid, mussels were collected in order to limit taking individuals from natural population that were not useful to the study's goals. |

## Reporting for specific materials, systems and methods

We require information from authors about some types of materials, experimental systems and methods used in many studies. Here, indicate whether each material, system or method listed is relevant to your study. If you are not sure if a list item applies to your research, read the appropriate section before selecting a response.

## Materials &amp; experimental systems

| n/a                                 | Involvement                                                     |
|-------------------------------------|-----------------------------------------------------------------|
| <input checked="" type="checkbox"/> | <input type="checkbox"/> Antibodies                             |
| <input checked="" type="checkbox"/> | <input type="checkbox"/> Eukaryotic cell lines                  |
| <input checked="" type="checkbox"/> | <input type="checkbox"/> Palaeontology                          |
| <input type="checkbox"/>            | <input checked="" type="checkbox"/> Animals and other organisms |
| <input checked="" type="checkbox"/> | <input type="checkbox"/> Human research participants            |
| <input checked="" type="checkbox"/> | <input type="checkbox"/> Clinical data                          |

## Methods

| n/a                                 | Involvement                                     |
|-------------------------------------|-------------------------------------------------|
| <input checked="" type="checkbox"/> | <input type="checkbox"/> ChIP-seq               |
| <input checked="" type="checkbox"/> | <input type="checkbox"/> Flow cytometry         |
| <input checked="" type="checkbox"/> | <input type="checkbox"/> MRI-based neuroimaging |

## Animals and other organisms

Policy information about [studies involving animals](#); [ARRIVE guidelines](#) recommended for reporting animal research

Laboratory animals

N/A

Wild animals

Adult mussels (> 1 year) were removed by hand by dislodging them from the standing dock. After mussels were spawned, they were lethally dissected for tissue samples for DNA analysis.

Field-collected samples

Mussels were transported from Thau Lagoon to the Laboratoire d'Océanographie (LOV) in Villefranche-sur-Mer, France and stored in a flow-through seawater system maintained at 15.2oC until spawning was induced.

Ethics oversight

No ethical approval was required for this study.

Note that full information on the approval of the study protocol must also be provided in the manuscript.
